# Supplementary material for: Highly divergent isolates of chrysanthemum virus B and chrysanthemum virus R infecting chrysanthemum in Russia
Source: PeerJ journal article supplement (doi:10.7717/peerj.12607), 2022-01-05
Supplement: Fig._S1.pdf [file Fig._S1.pdf]

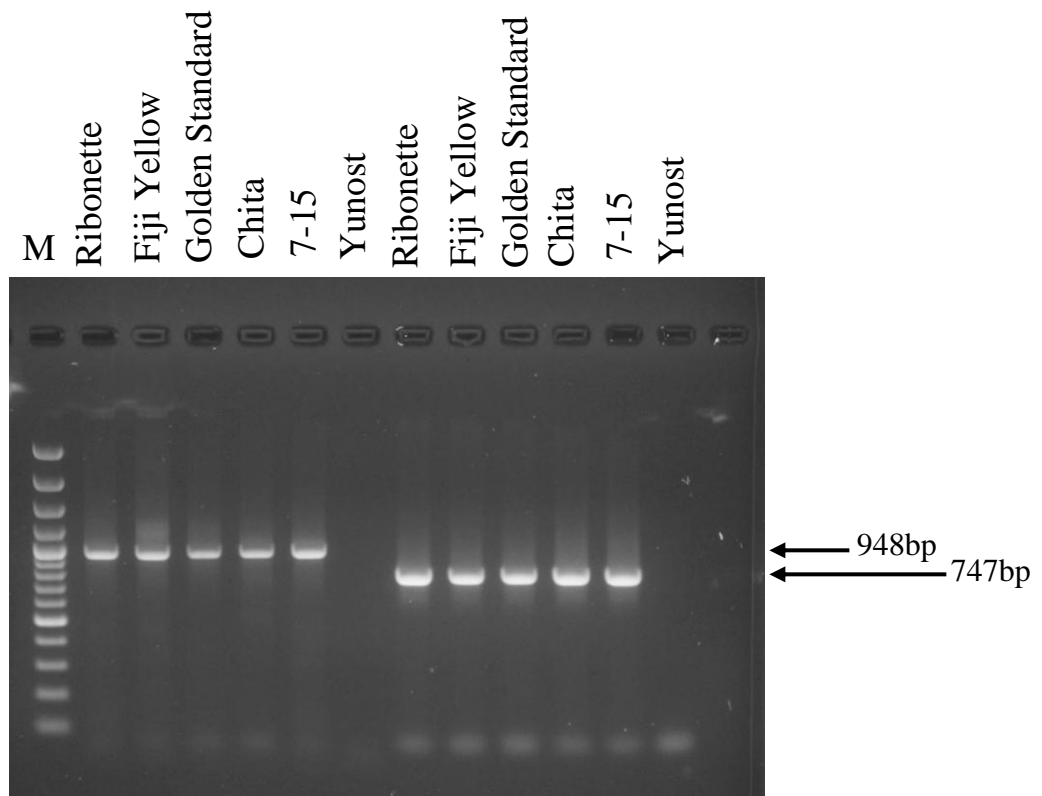

**Figure S1.** Representative analysis of RT-PCR products from chrysanthemum virus R (CVR)- and chrysanthemum virus B (CVB)-infected plants by agarose gel electrophoresis. The names of chrysanthemum cultivars are indicated above the picture. M - GeneRuler 100 bp DNA ladder Plus (Thermo Scientific). The arrows to the right of the picture indicate the CVR- and CVB-specific PCR products of 747 and 948 base pairs, respectively.
