# Supplementary material for: Highly divergent isolates of chrysanthemum virus B and chrysanthemum virus R infecting chrysanthemum in Russia
Source: PeerJ journal article supplement (doi:10.7717/peerj.12607), 2022-01-05
Supplement: Fig._S2.pdf [file Fig._S2.pdf]

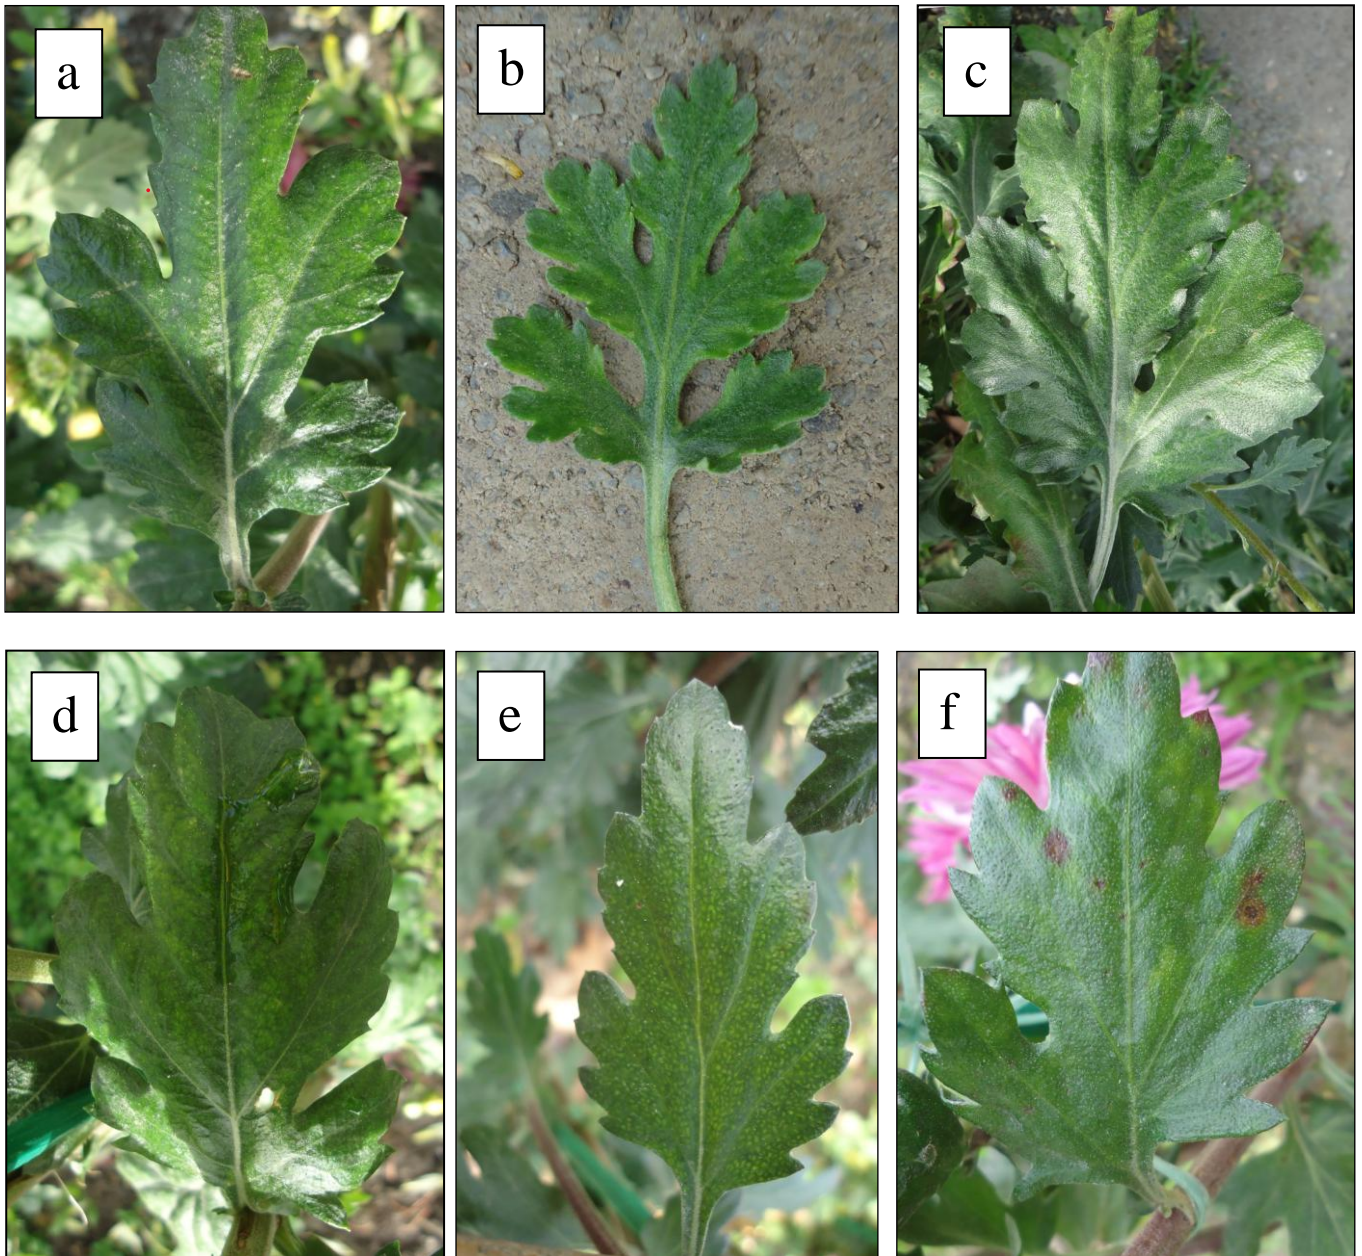

**Figure S2.** Typical symptoms on the leaves of chrysanthemum cultivars Fiji Yellow (**a**), Ribonette (**b**), Golden Standard (**c**), Chita (**d**), Yunost (**e**), and hybrid 7-15 (**f**). Samples **a - d** and **f** are co-infected with chrysanthemum virus R (CVR) and chrysanthemum virus B (CVB); **e** - no CVR and CVB were detected.
