# Supplementary material for: Highly divergent isolates of chrysanthemum virus B and chrysanthemum virus R infecting chrysanthemum in Russia
Source: PeerJ journal article supplement (doi:10.7717/peerj.12607), 2022-01-05
Supplement: Figure_S3.pdf [file Figure_S3.pdf]

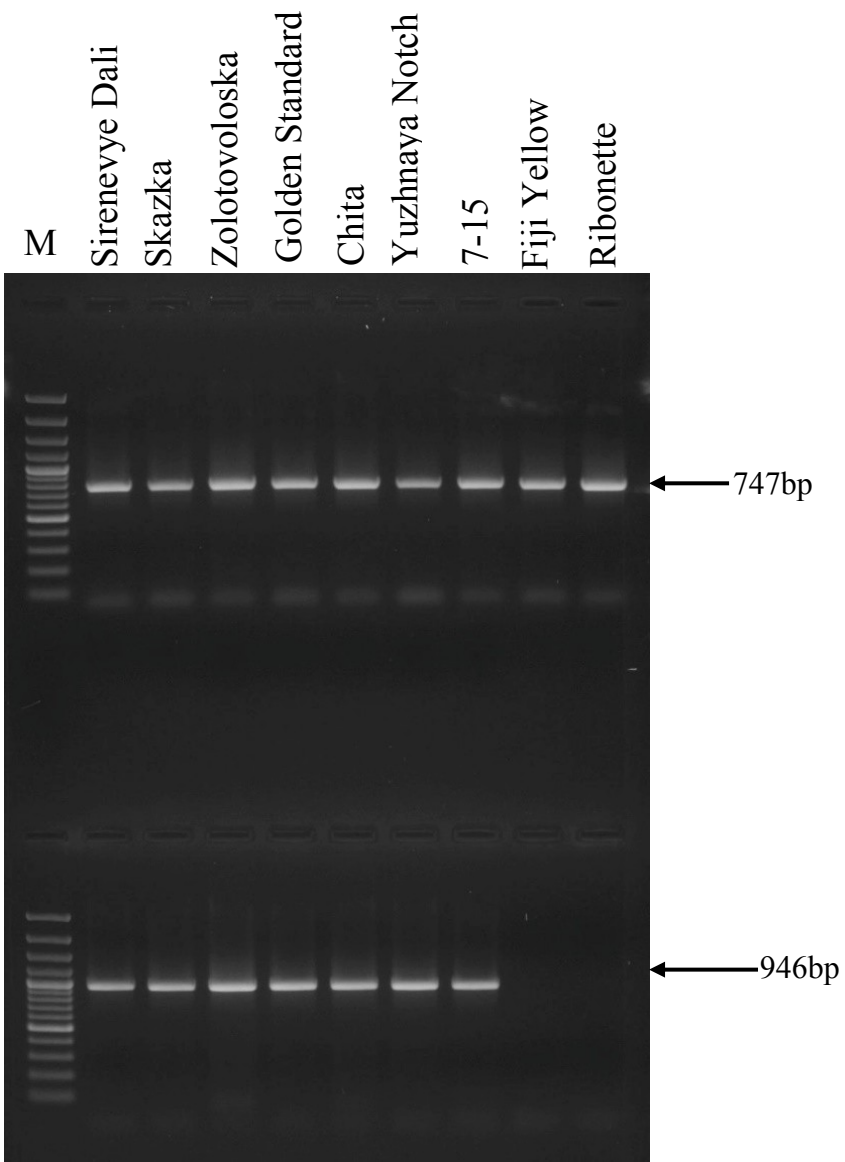

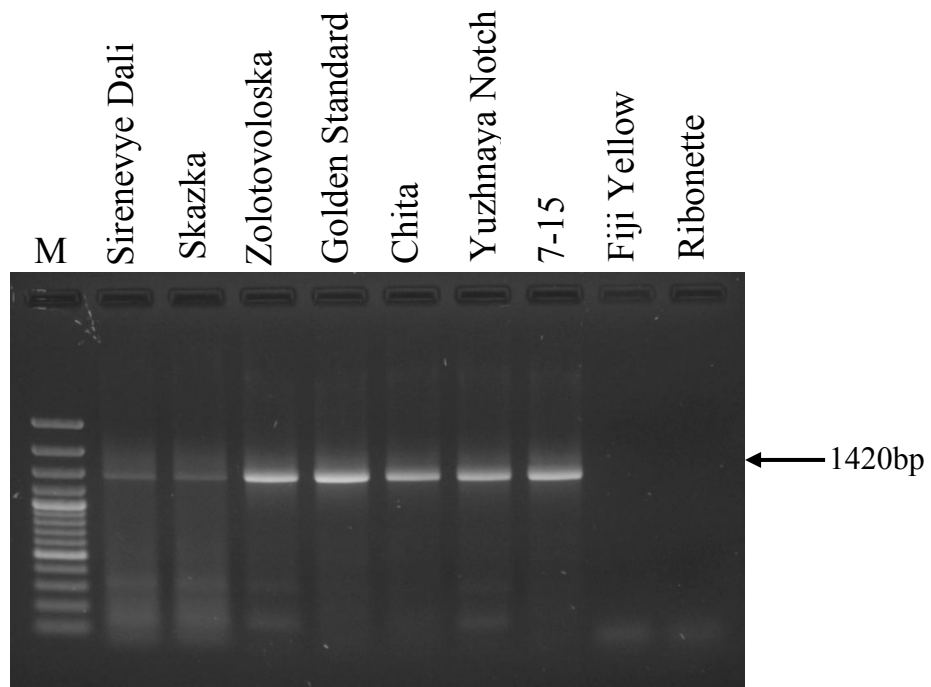

**Figure S3.** Representative analysis of RT-PCR products from chrysanthemum virus R (CVR)-infected plants by agarose gel electrophoresis. The names of chrysanthemum cultivars are indicated above the picture. M - GeneRuler 100 bp DNA ladder Plus (Thermo Scientific). The arrows to the right of the picture indicates the CVR-specific PCR products of 747, 946, and 1420 base pairs.
